# Supplementary material for: Cloning and functional characterization of porcine AACS revealing the regulative roles for fat deposition in pigs
Source: PeerJ. 2023 Nov 20;11:e16406. doi: 10.7717/peerj.16406 (PMC10666648; doi:10.7717/peerj.16406)
Supplement: Supplemental Information 7 [file peerj-11-16406-s007.zip]

Archive with 4 entries (4 files):
- uncropped gels/AACS-SqRT-PCR (Figure 2uncropped gels).pdf
- uncropped gels/RACE-(Figure 1uncropped gels).pdf
- uncropped gels/race-3-5(Figure 1uncropped gels).pdf
- uncropped gels/SqRT-PCR-actin(Figure 2uncropped gels).pdf
