# Supplementary figures and images for: Cloning and functional characterization of porcine AACS revealing the regulative roles for fat deposition in pigs
Source: PeerJ journal article supplement (doi:10.7717/peerj.16406), 2023-11-20

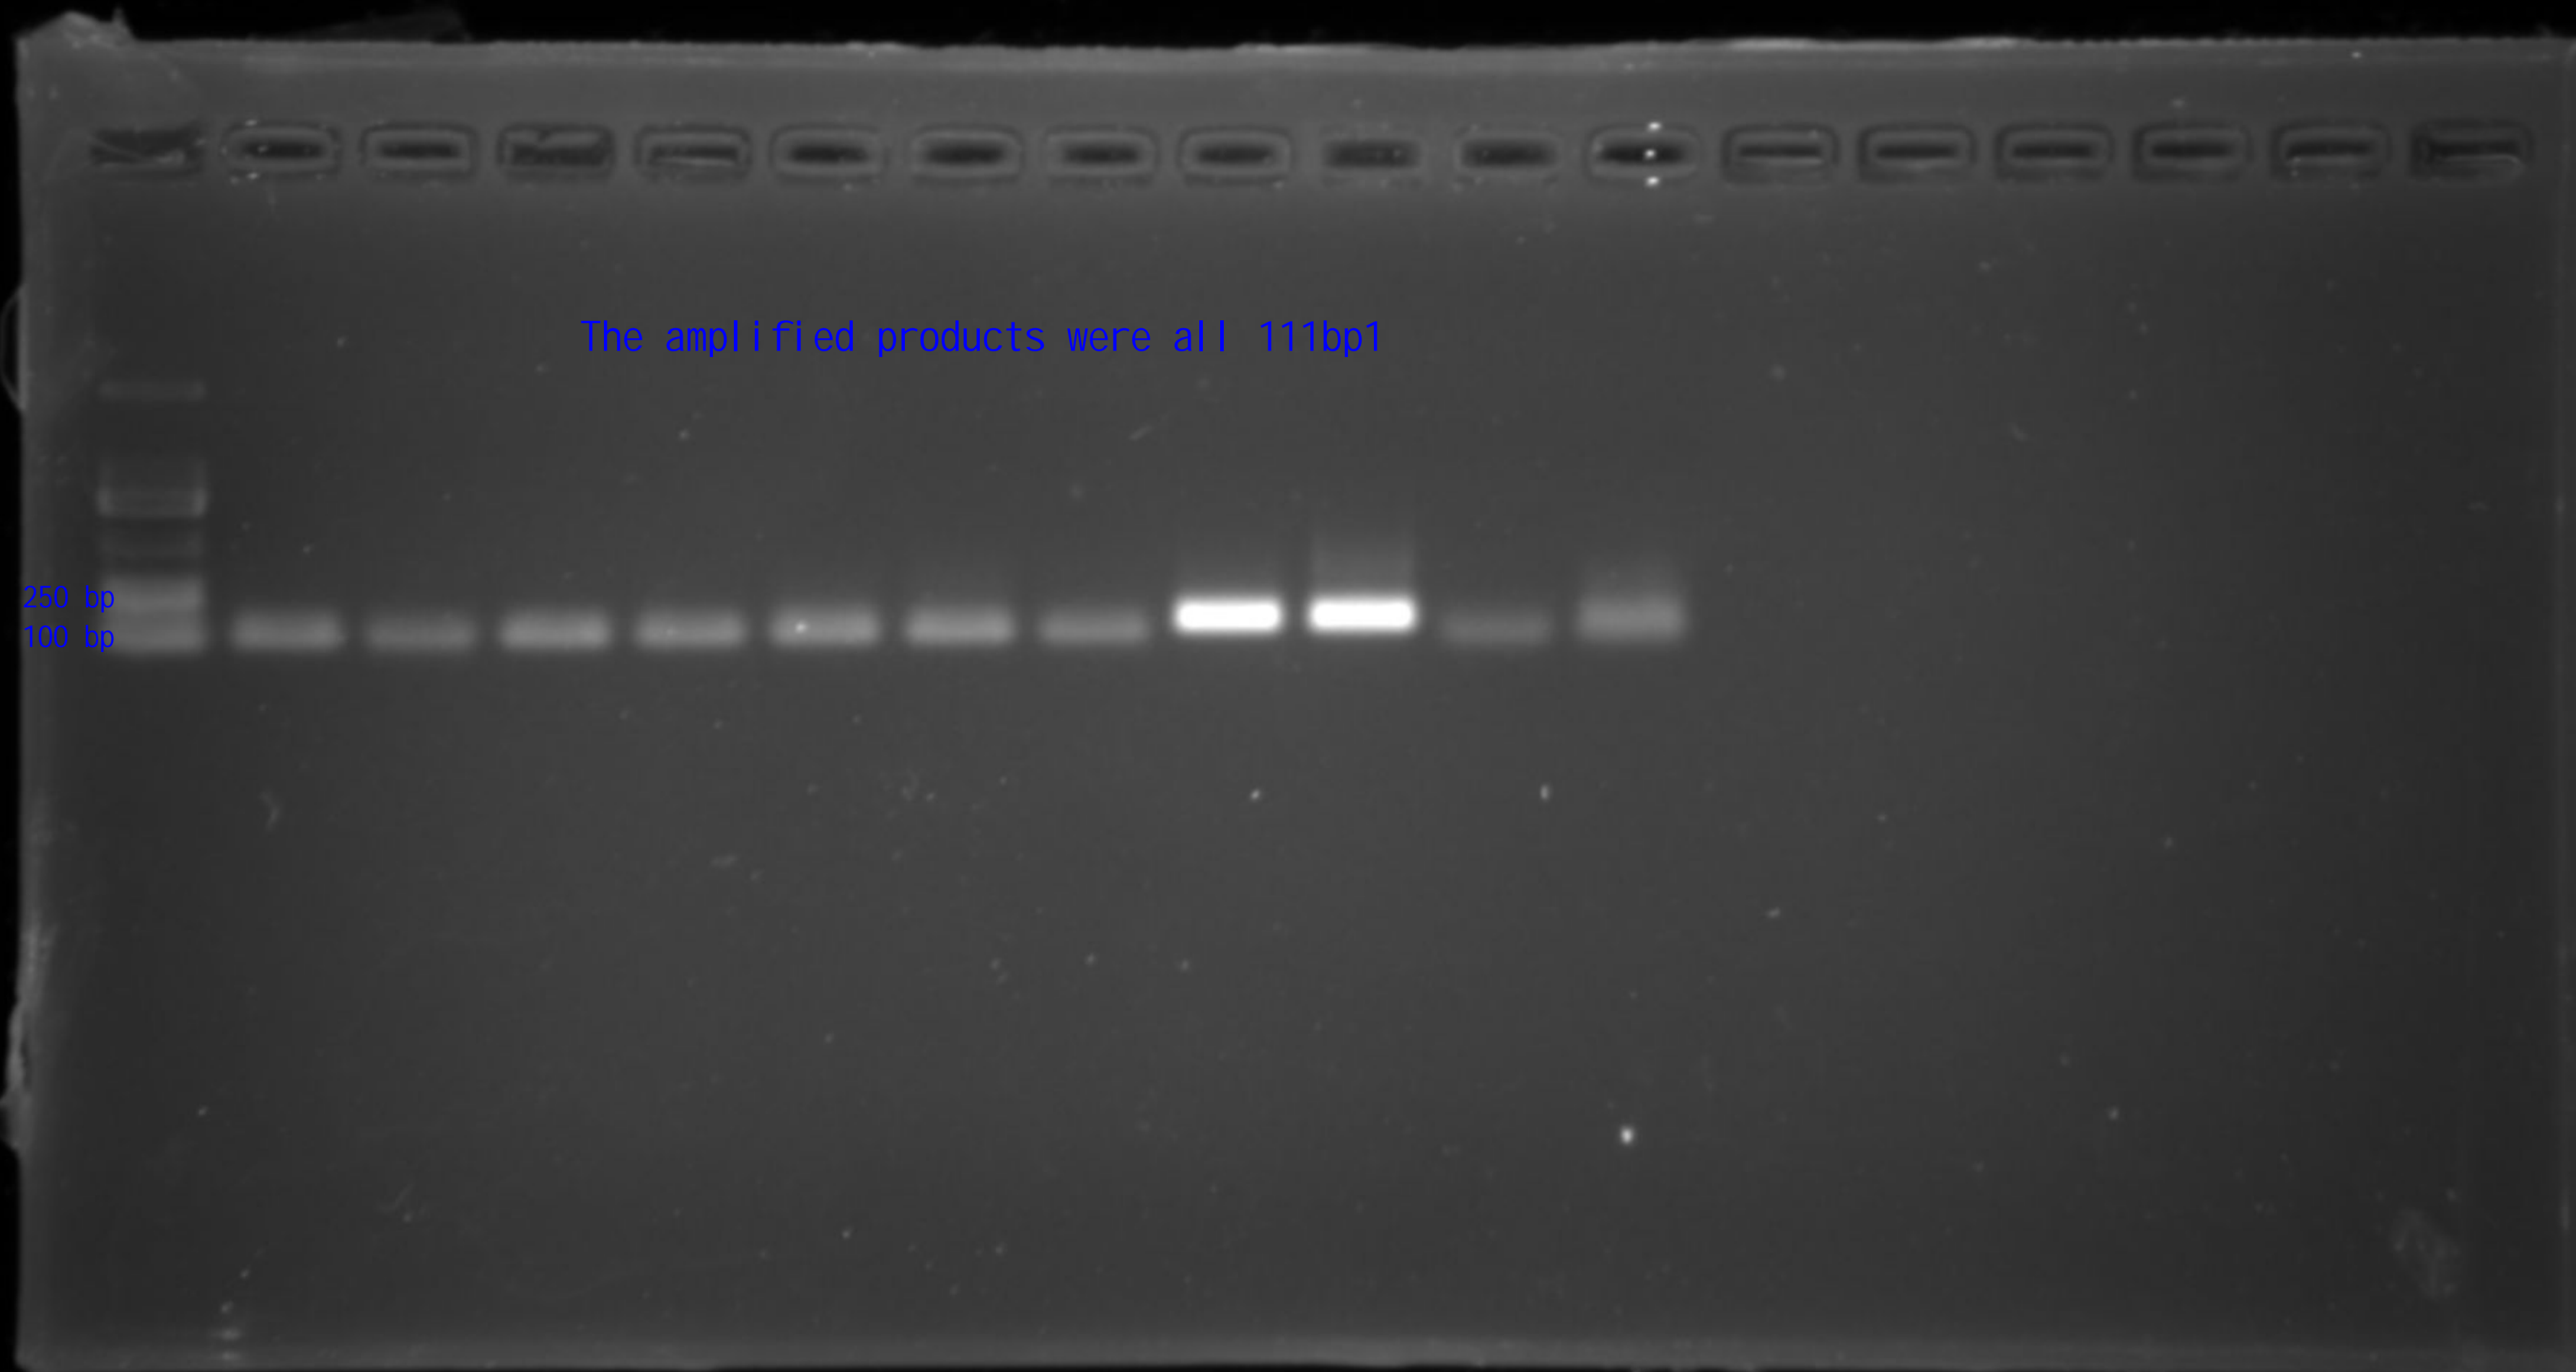

Supplement: uncropped_gels.zip [file uncropped_gels.zip]

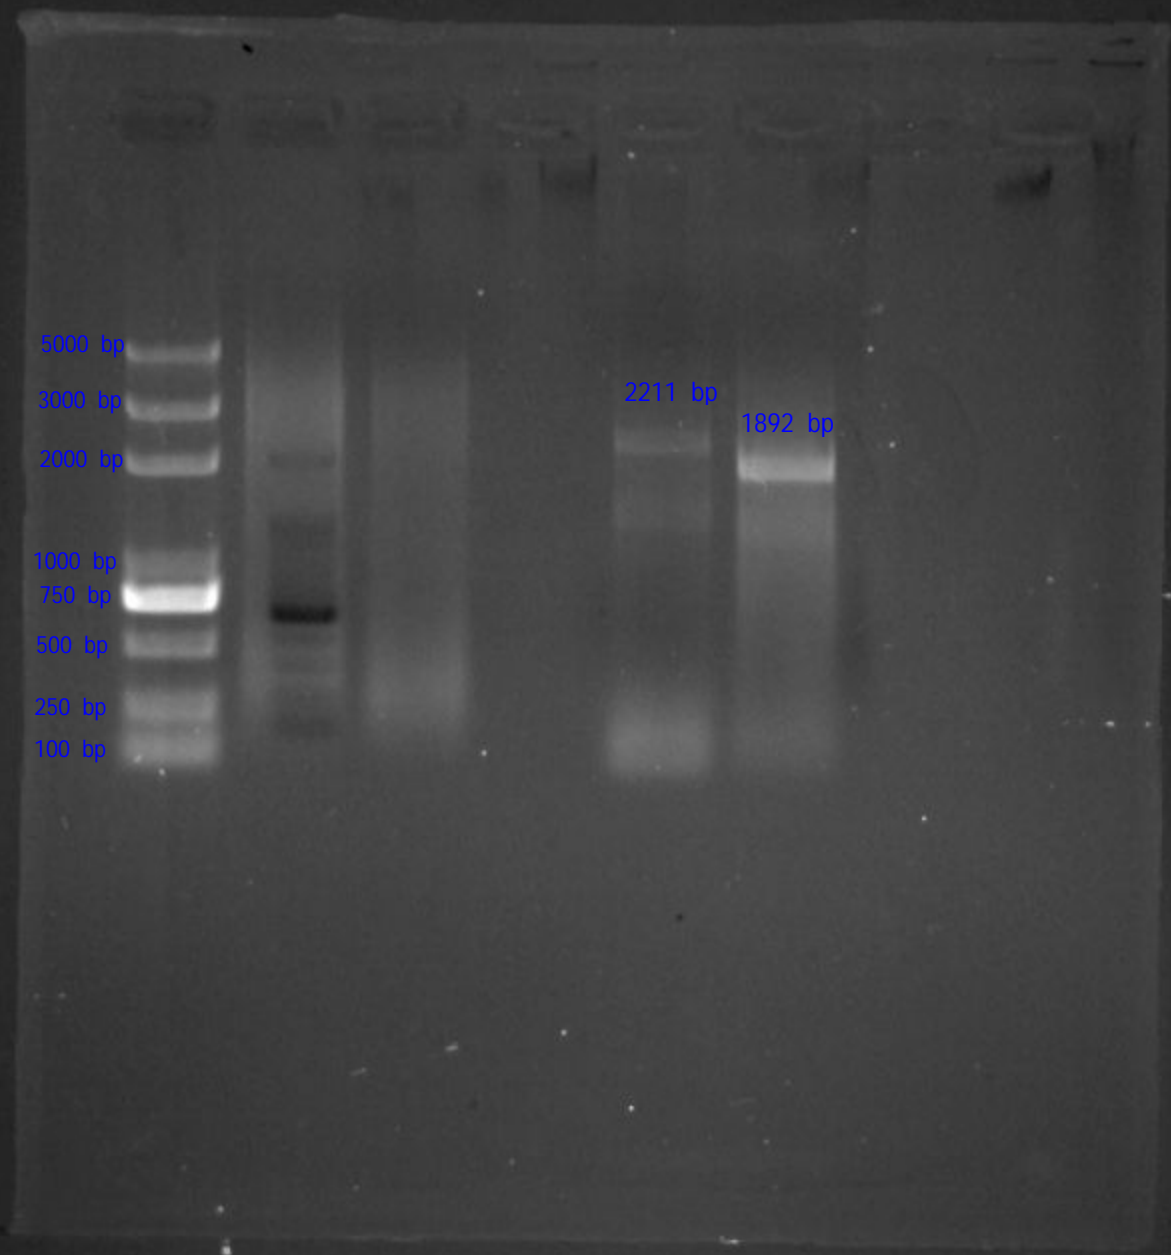

Supplement: uncropped_gels.zip [file uncropped_gels.zip]

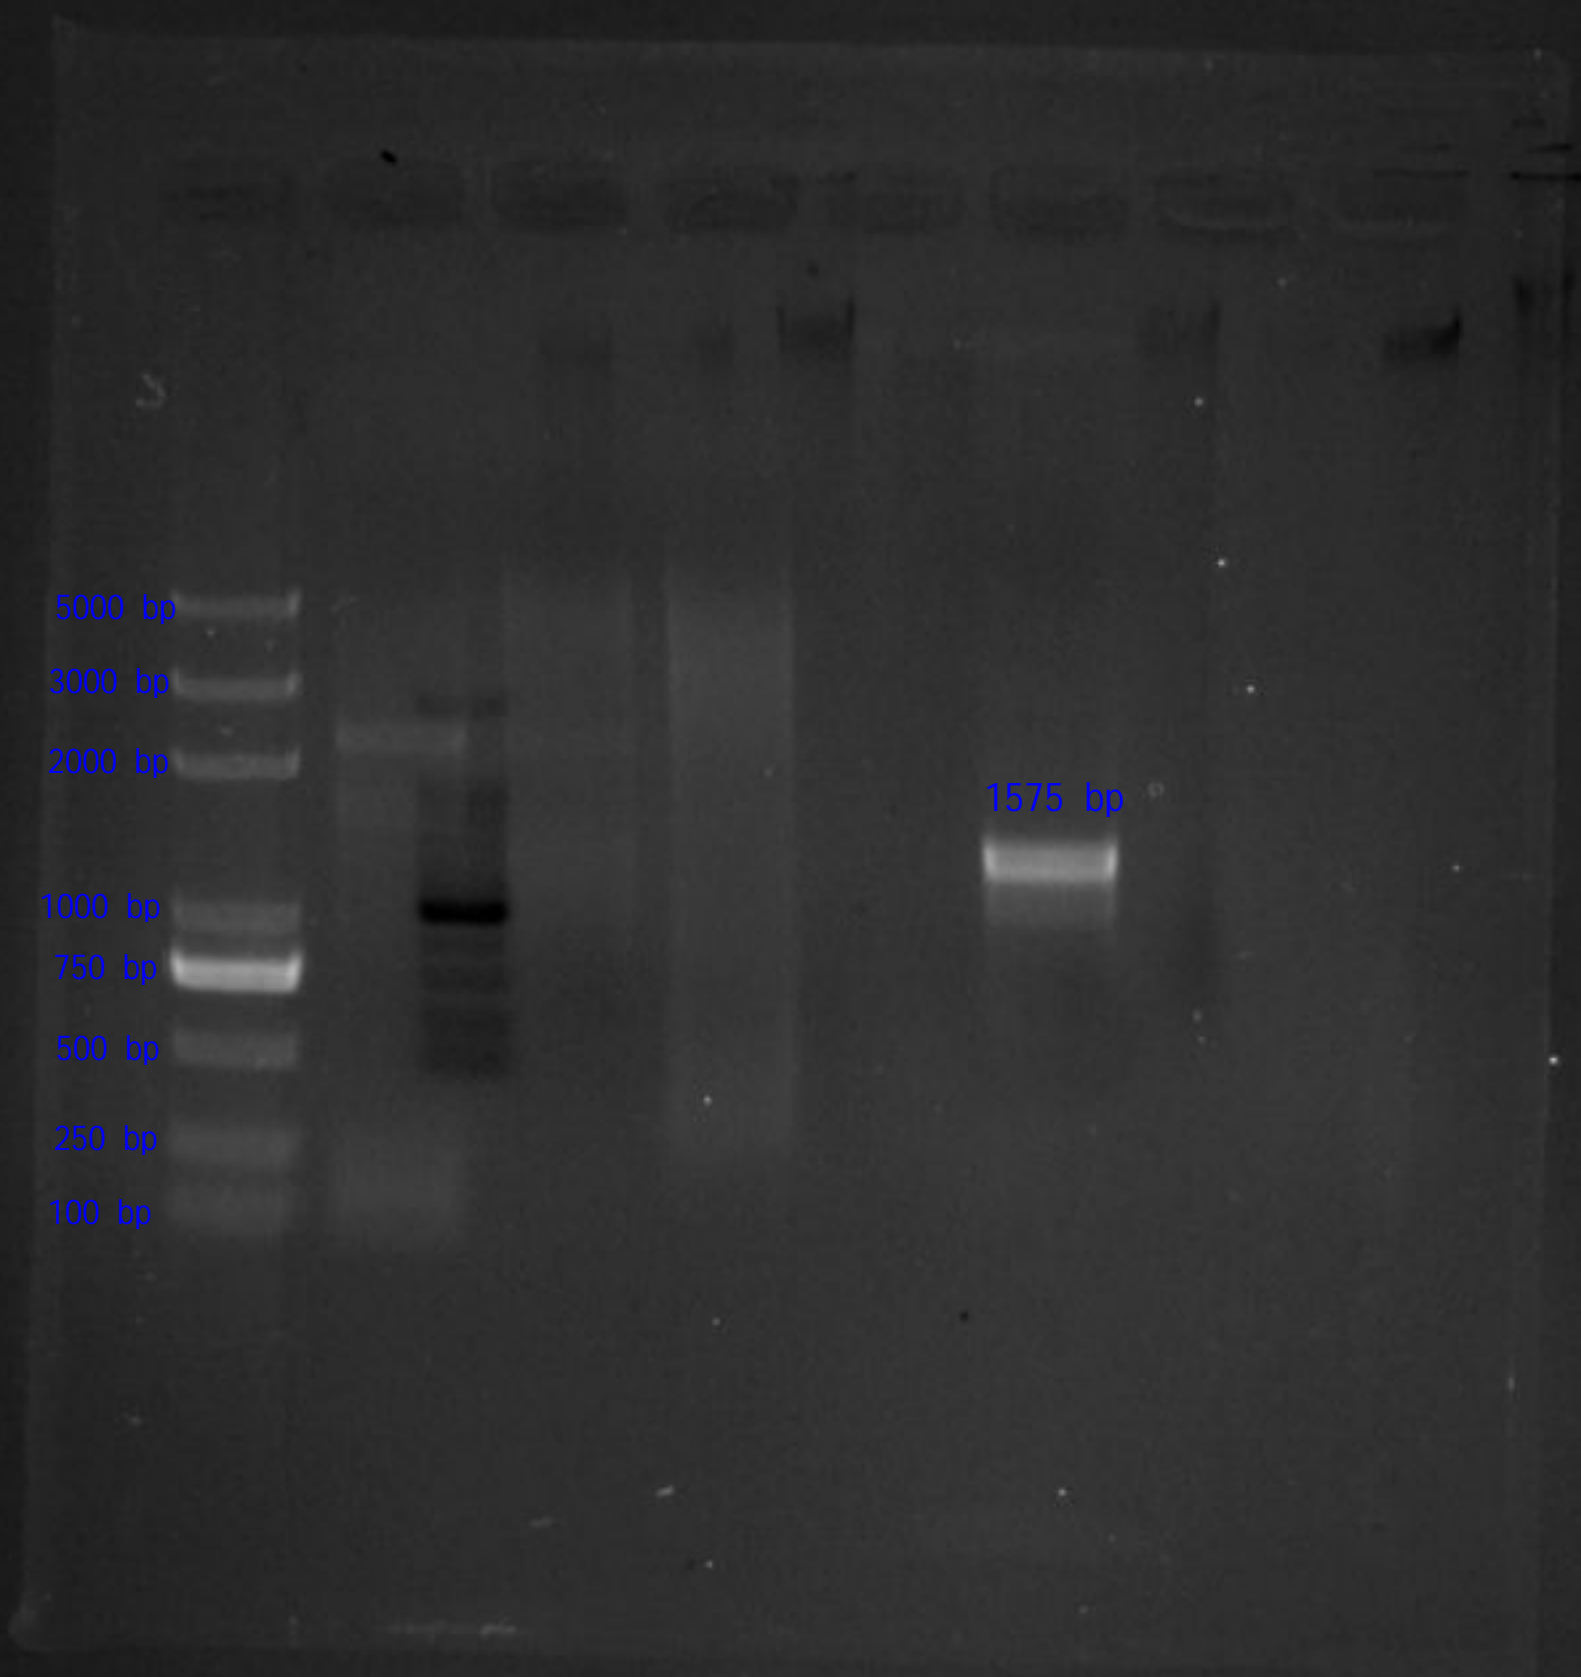

Supplement: uncropped_gels.zip [file uncropped_gels.zip]

The amplified products were all 111bp

750 bp  
500 bp  
250 bp  
100 bp

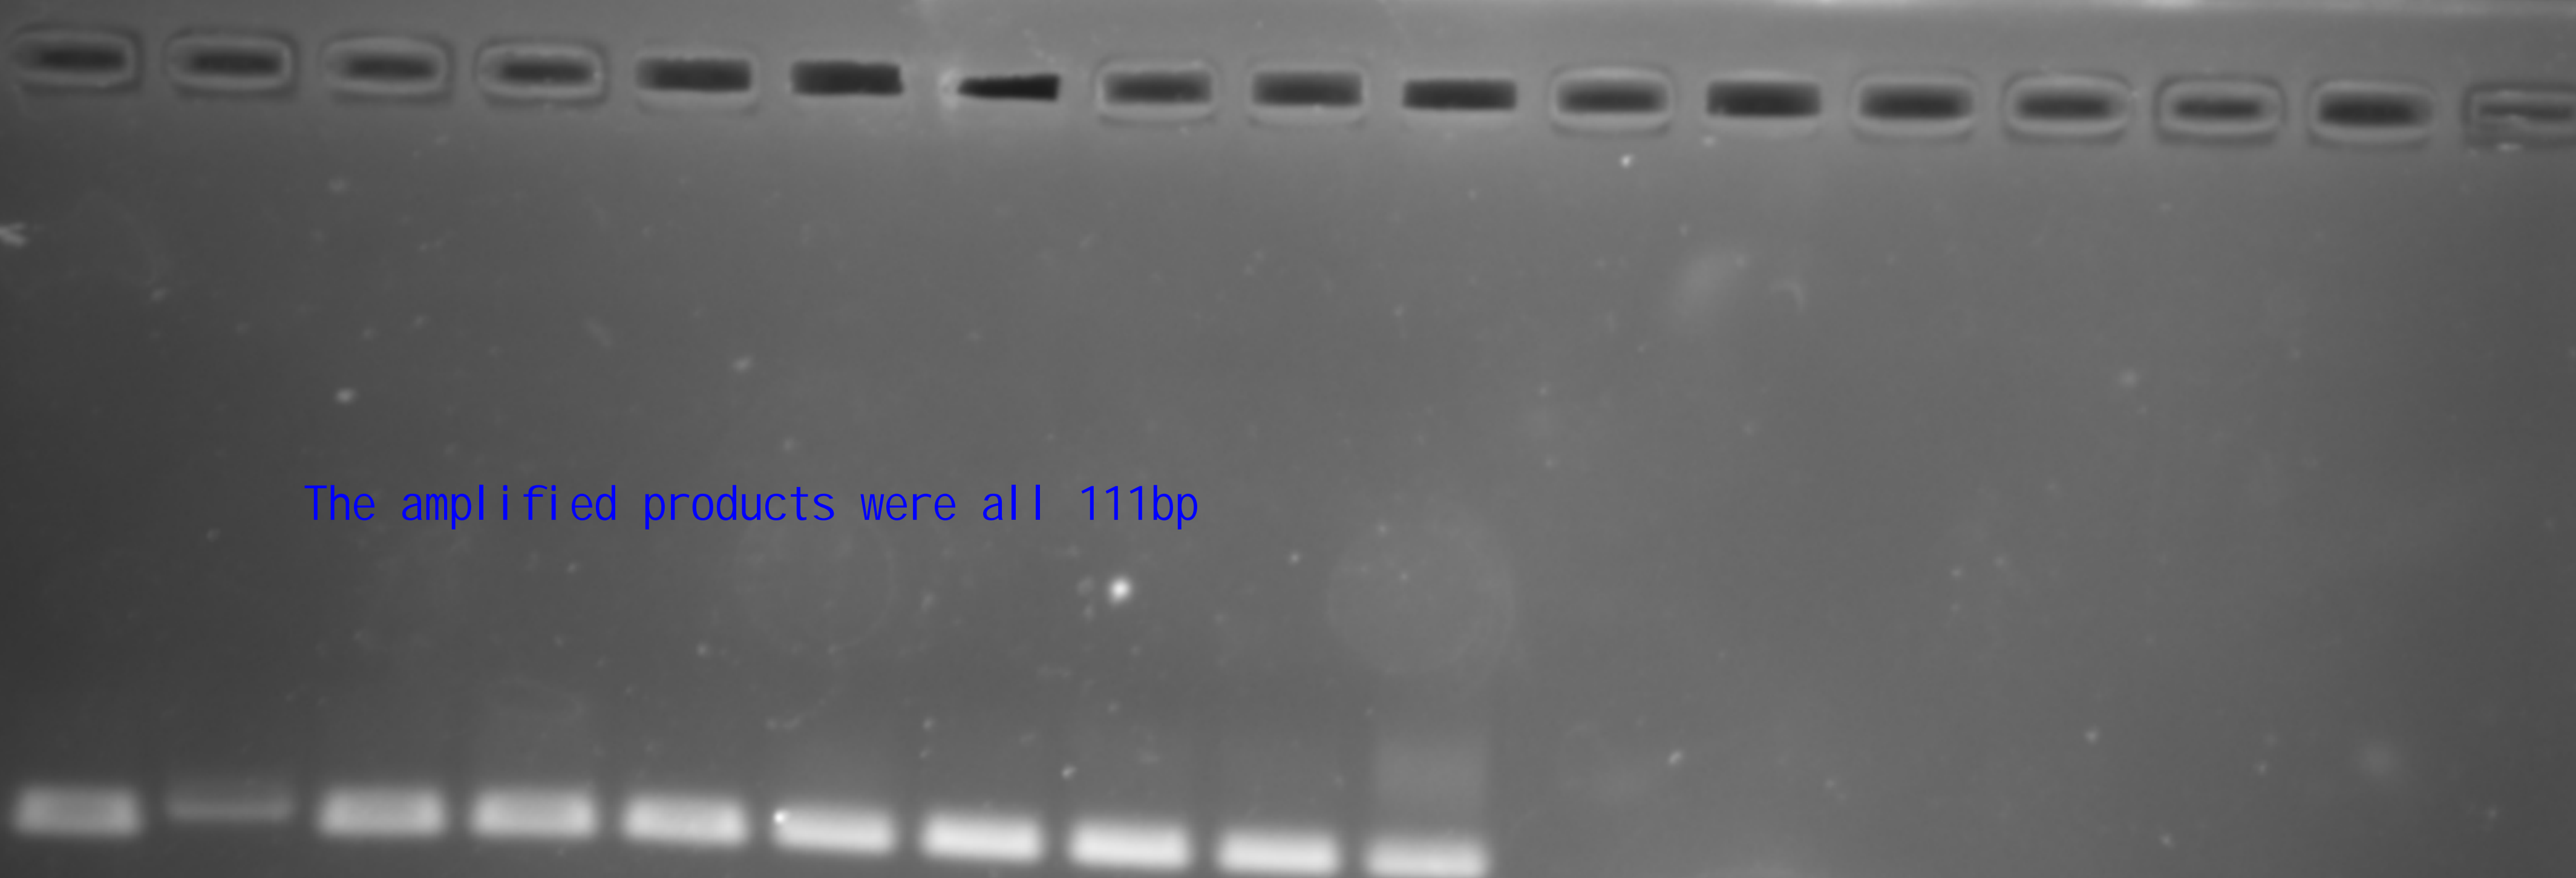

Supplement: uncropped_gels.zip [file uncropped_gels.zip]
